# Supplementary material
Source: PubMed Central journal article supplement (PMC2000510)

affinity determination

hierarchical tree determination

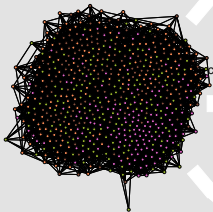

Co-  
classification

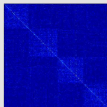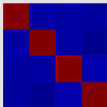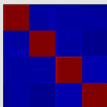

Hierarchical  
clustering

Hierarchical  
clustering

Box model  
clustering

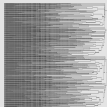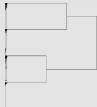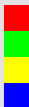

Supplement: pnas_0703740104_4.pdf [file pnas_0703740104_4.pdf]
