# Supplementary material
Source: PubMed Central journal article supplement (PMC2000510)

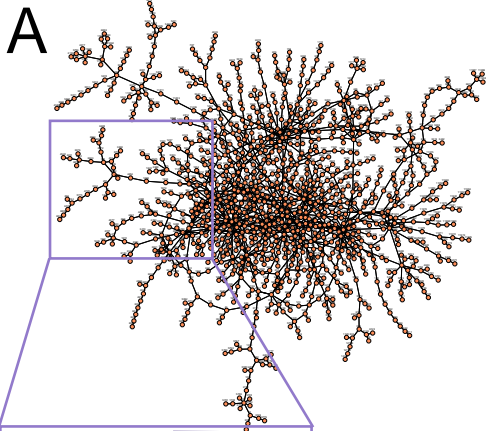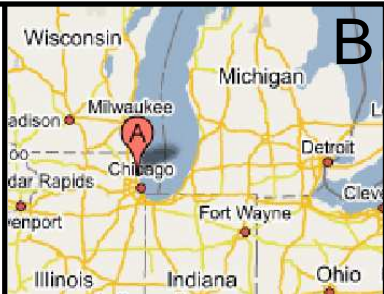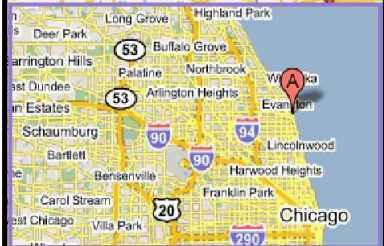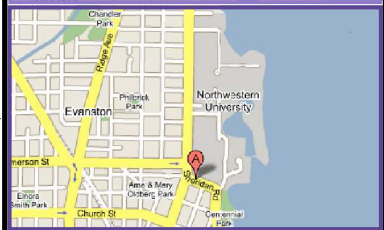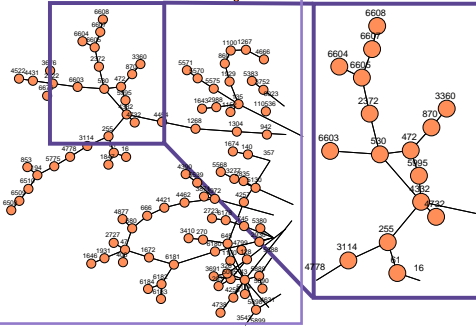

Supplement: pnas_0703740104_1.pdf [file pnas_0703740104_1.pdf]

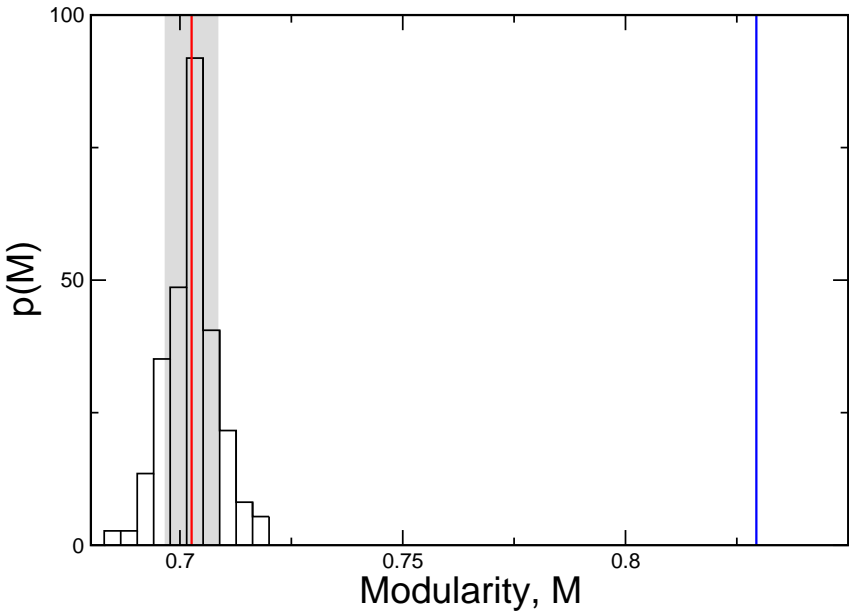

Supplement: pnas_0703740104_2.pdf [file pnas_0703740104_2.pdf]

Classical scaling

Hierarchical clustering

Ordering via SA

A

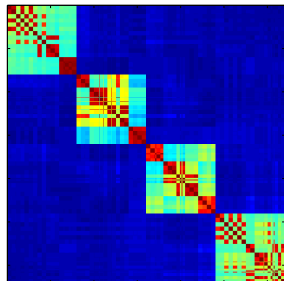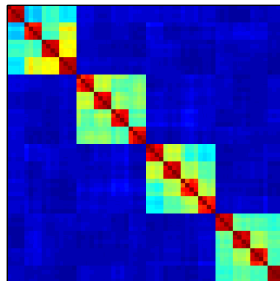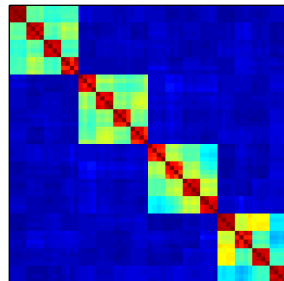

B

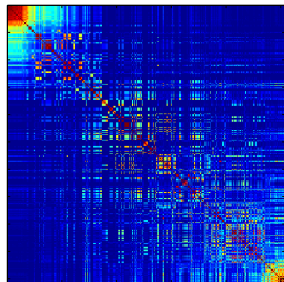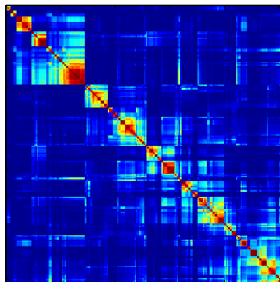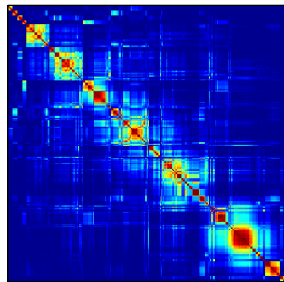

Supplement: pnas_0703740104_3.pdf [file pnas_0703740104_3.pdf]

**A**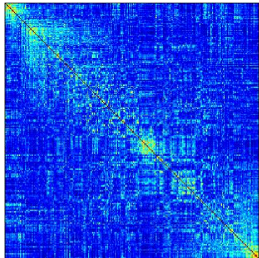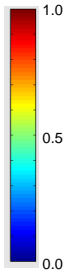**B**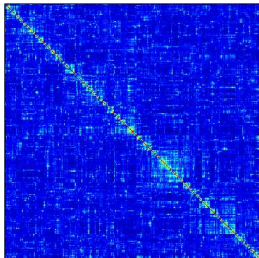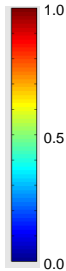

Supplement: pnas_0703740104_5.pdf [file pnas_0703740104_5.pdf]

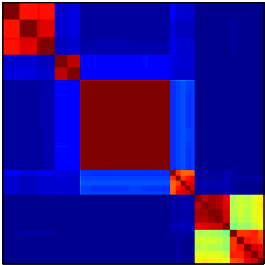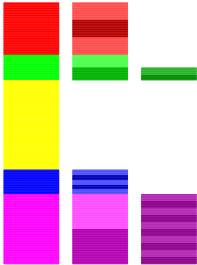

Supplement: pnas_0703740104_6.pdf [file pnas_0703740104_6.pdf]

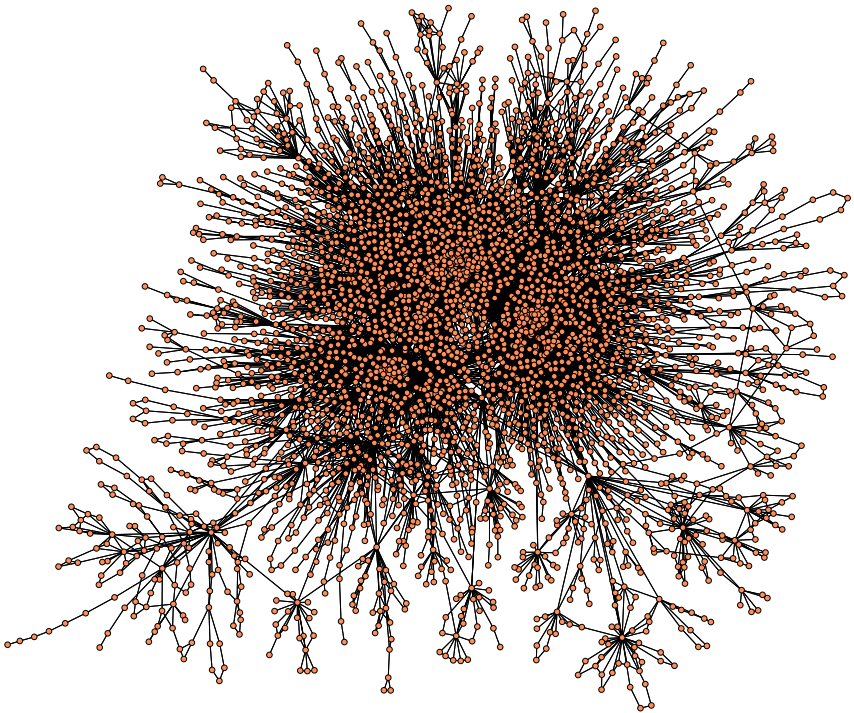

Supplement: pnas_0703740104_7.pdf [file pnas_0703740104_7.pdf]

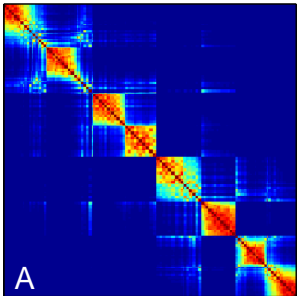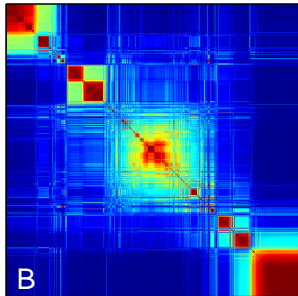

Supplement: pnas_0703740104_8.pdf [file pnas_0703740104_8.pdf]
